# Supplementary material for: Association of Albuminuria and Regression of Chronic Kidney Disease in Adults With Newly Diagnosed Moderate to Severe Chronic Kidney Disease
Source: PubMed Central journal article supplement (PMC9364131; doi:10.1001/jamanetworkopen.2022.25821), 2022-08-09
Supplement: jamanetwopen-e2225821-s001.pdf [file jamanetwopen-e2225821-s001.pdf]

## Supplemental Online Content

Pasternak M, Liu P, Quinn R, et al. Association of albuminuria and regression of chronic kidney disease in adults with newly diagnosed moderate to severe chronic kidney disease. *JAMA Netw Open*. 2022;5(8):e2225821. doi:10.1001/jamanetworkopen.2022.25821

**eTable 1.** Sustained eGFR Methods for Cohort Formation and Kidney Outcome Ascertainment

**eTable 2.** Baseline Characteristics Including Missing Values of Proteinuria

**eTable 3.** Cause-Specific Hazard Ratios for Outcomes (No Interaction Model)

**eTable 4.** Cause-Specific Hazard Ratios for Outcomes (Interaction Model)

**eTable 5.** Cause-Specific Hazard Ratios for Regression (Sensitivity and Subgroup Analyses) Associated With Albuminuria

**eTable 6.** Cause-Specific Hazard Ratios, Subdistribution Hazard Ratios for Regression Associated With Albuminuria

**eFigure 1.** Derivation of Study Cohort

**eFigure 2.** Study Participants With Missing Albuminuria Measures Per Year Prior to the Study Period

**eFigure 3.** Cumulative Incidence Functions for Outcomes in People With Complete and Missing Albuminuria Data

**eFigure 4.** Association Between eGFR and CKD Regression Across Albuminuria Categories

**eFigure 5.** Crude 5-Year Risk of Outcomes by Category of Albuminuria (Sensitivity Analysis)

**eFigure 6.** Crude 5-Year Risk of Outcomes by Diabetes Status

**eFigure 7.** Crude 5-Year Risk of Outcomes According to the Type of Albuminuria Measurement

**eFigure 8.** Crude 5-Year Risk of Outcomes According to Timing of Albuminuria Measurement

**eFigure 9.** Crude 5-Year Risk of Outcomes in Participants Without and With eGFR Before Study Entry

**eFigure 10.** Crude 5-Year Risk of Outcomes in Participants With and Without Sustained Albuminuria at Baseline

This supplemental material has been provided by the authors to give readers additional information about their work.

**eTable 1.** Sustained eGFR Methods for Cohort Formation and Kidney Outcome Ascertainment

| Cohorts      | Qualifying period for entry |                                                                      |                                                      | Outcomes                       | Qualifying period for outcomes |                                                                      |                                                        |
|--------------|-----------------------------|----------------------------------------------------------------------|------------------------------------------------------|--------------------------------|--------------------------------|----------------------------------------------------------------------|--------------------------------------------------------|
|              | <i>First eGFR</i>           | <i>Possible intervening measurements within 90-days of the first</i> | <i>Last eGFR (Index date) &gt;90 days from first</i> |                                | <i>First eGFR</i>              | <i>Possible intervening measurements within 90-days of the first</i> | <i>Last eGFR (outcome date) &gt;90 days from first</i> |
| Moderate CKD | <45                         | <45                                                                  | ≥30 to <45                                           | Regression                     | ≥45                            | ≥45                                                                  | ≥45                                                    |
|              |                             |                                                                      |                                                      | Progression                    | <30                            | <30                                                                  | <30                                                    |
|              |                             |                                                                      |                                                      | Kidney failure <sub>eGFR</sub> | <15                            | <15                                                                  | <15                                                    |
| Severe CKD   | <30                         | <30                                                                  | ≥15 to <30                                           | Regression                     | ≥30                            | ≥30                                                                  | ≥30                                                    |
|              |                             |                                                                      |                                                      | Kidney failure <sub>eGFR</sub> | <15                            | <15                                                                  | <15                                                    |

Legend: CKD regression was defined as a sustained improvement to a better eGFR category for >3 months (>45 for G3b or >30 for G4), accompanied by a 25% or greater increase in the last eGFR from baseline (eGFR at index date). CKD progression was defined as a sustained decrease in eGFR below 30 for CKD stage G3b or below 15 for G4) for >3 months, accompanied by a 25% or greater drop in the last eGFR from baseline (eGFR at index date).

**eTable 2. Baseline Characteristics Including Missing Values of Proteinuria**

| Characteristics                          | All               | Measured       | Unmeasured     |
|------------------------------------------|-------------------|----------------|----------------|
|                                          | <b>N = 65,509</b> | N = 58,004     | N = 7,505      |
| Age (years)                              | 79 (71, 85)       | 78 (70, 85)    | 83 (75, 89)    |
| <70                                      | 15,455 (24)       | 14,383 (25)    | 1,072 (14)     |
| 70-79                                    | 19,897 (30)       | 18,109 (31)    | 1,788 (24)     |
| 80-84                                    | 12,654 (19)       | 11,219 (19)    | 1,435 (19)     |
| ≥85                                      | 17,503 (27)       | 14,293 (25)    | 3,210 (43)     |
| Sex                                      |                   |                |                |
| Female                                   | 36,300 (55%)      | 31,725 (55)    | 4,575 (61)     |
| Male                                     | 29,209 (45%)      | 26,279 (45)    | 2,930 (39)     |
| Qualifying period (QP, days)             | 171 (113, 305)    | 168 (112, 292) | 211 (124, 407) |
| N of eGFR tests during                   | 2 (2, 3)          | 2 (2, 3)       | 2 (2, 3)       |
| Outpatient eGFR before QP                |                   |                |                |
| No prior eGFR                            | 3,497 (5.3%)      | 2,641 (5)      | 856 (11)       |
| Prior eGFR recorded                      | 62,012 (95%)      | 55,363 (95)    | 6,649 (89)     |
| Index eGFR (mL/min/1.73 m <sup>2</sup> ) | 38 (33, 42)       | 38 (33, 42)    | 38 (33, 42)    |
| CKD stage                                |                   |                |                |
| G3b                                      | 54,725 (84%)      | 48,376 (83)    | 6,349 (85)     |
| G4                                       | 10,784 (16%)      | 9,628 (17)     | 1,156 (15)     |
| Comorbidities                            | 32,002 (49%)      |                |                |
| Cardiovascular disease                   | 6,685 (10%)       | 27,742 (48)    | 4,260 (57)     |
| Myocardial infarction                    | 19,617 (30%)      | 5,818 (10)     | 867 (12)       |
| Congestive heart failure                 | 4,239 (6.5%)      | 16,770 (29)    | 2,847 (38)     |
| Peripheral vascular disease              | 15,204 (23%)      | 3,764 (7)      | 475 (6)        |
| Stroke or TIA                            | 27,524 (42%)      | 13,218 (23)    | 1,986 (26)     |
| Diabetes                                 | 49,822 (76%)      | 25,727 (44)    | 1,797 (24)     |
| Dispensed medications                    | 12,485 (19%)      |                |                |
| ACEi/ARB                                 | 33,137 (51%)      | 44,622 (77)    | 5,200 (69)     |
| NSAIDs                                   | 171 (113, 305)    | 11,190 (19)    | 1,295 (17)     |
| Statins                                  | 2 (2, 3)          | 30,299 (52)    | 2,838 (38)     |

ACEi, angiotensin-converting enzyme inhibitor; ARB, angiotensin-receptor blocker; eGFR, estimated glomerular filtration rate; NSAIDs, non-steroidal anti-inflammatory drugs; PCR, protein-creatinine ratio; TIA, transient ischemic attack. Values are median (inter quartile range) or number (%).

**eTable 3. Cause-Specific Hazard Ratios for Outcomes (No Interaction Model)**

| Covariates                        | Hazard ratio (95% confidence interval) |                   |                   |
|-----------------------------------|----------------------------------------|-------------------|-------------------|
|                                   | Regression                             | Progr. or KF      | Death             |
| Albuminuria <sup>a</sup>          |                                        |                   |                   |
| A1                                | 1 (reference)                          | 1 (reference)     | 1 (reference)     |
| A2                                | 0.75 (0.72, 0.79)                      | 1.84 (1.75, 1.93) | 1.31 (1.27, 1.36) |
| A3<60                             | 0.47 (0.40, 0.54)                      | 2.92 (2.67, 3.20) | 1.36 (1.23, 1.50) |
| A3≥60                             | 0.27 (0.24, 0.30)                      | 5.64 (5.34, 5.97) | 1.50 (1.40, 1.60) |
| Index eGFR <sup>b</sup>           |                                        |                   |                   |
| 15-19                             | 1 (reference)                          | 1 (reference)     | 1 (reference)     |
| 20-24                             | 1.59 (0.46, 5.46)                      | 0.47 (0.31, 0.72) | 0.76 (0.32, 1.78) |
| 25-29                             | 2.87 (0.88, 9.35)                      | 0.21 (0.14, 0.32) | 0.59 (0.26, 1.34) |
| 30-34                             | 5.64 (1.77, 17.92)                     | 0.16 (0.11, 0.24) | 0.56 (0.26, 1.22) |
| 35-39                             | 5.63 (1.81, 17.54)                     | 0.09 (0.06, 0.13) | 0.32 (0.15, 0.68) |
| 40-44                             | 3.59 (1.15, 11.17)                     | 0.07 (0.05, 0.10) | 0.14 (0.07, 0.30) |
| Age (10 years)                    | 1.03 (0.89, 1.18)                      | 0.68 (0.65, 0.72) | 1.76 (1.61, 1.91) |
| Age by eGFR                       |                                        |                   |                   |
| 20-24                             | 1.01 (0.86, 1.18)                      | 1.02 (0.96, 1.09) | 1.02 (0.92, 1.14) |
| 25-29                             | 0.93 (0.80, 1.08)                      | 1.06 (0.99, 1.13) | 1.03 (0.94, 1.14) |
| 30-34                             | 0.80 (0.69, 0.93)                      | 1.25 (1.19, 1.33) | 1.03 (0.94, 1.13) |
| 35-39                             | 0.82 (0.71, 0.95)                      | 1.30 (1.23, 1.38) | 1.09 (0.99, 1.19) |
| 40-44                             | 0.85 (0.73, 0.98)                      | 1.28 (1.21, 1.35) | 1.18 (1.07, 1.29) |
| Male vs female                    | 0.85 (0.82, 0.89)                      | 1.09 (1.05, 1.13) | 1.22 (1.18, 1.26) |
| Number of eGFR tests <sup>c</sup> | 1.05 (1.04, 1.05)                      | 1.03 (1.03, 1.04) | 1.06 (1.05, 1.06) |
| Diabetes                          | 1.03 (0.99, 1.07)                      | 1.48 (1.42, 1.54) | 1.15 (1.12, 1.19) |
| Myocardial infarction             | 0.99 (0.93, 1.06)                      | 0.93 (0.88, 1.00) | 1.19 (1.13, 1.24) |
| Congestive heart failure          | 1.31 (1.25, 1.37)                      | 1.25 (1.20, 1.31) | 1.96 (1.89, 2.02) |
| Stroke/TIA                        | 1.12 (1.07, 1.17)                      | 1.01 (0.96, 1.06) | 1.24 (1.20, 1.29) |
| Peripheral vascular disease       | 1.11 (1.03, 1.20)                      | 1.09 (1.01, 1.18) | 1.50 (1.42, 1.58) |
| ACEi/ARB                          | 1.04 (1.00, 1.09)                      | 1.12 (1.07, 1.18) | 0.77 (0.74, 0.80) |
| NSAIDs                            | 1.30 (1.25, 1.36)                      | 0.93 (0.88, 0.97) | 0.89 (0.86, 0.93) |
| Statin                            | 0.97 (0.93, 1.01)                      | 1.01 (0.97, 1.05) | 0.79 (0.76, 0.82) |

Model log-likelihood (LL) -116443.7 (model without interaction between age and eGFR, LL -116471.1)

Progr. or KF: Progression or kidney failure

<sup>a</sup>Categories of albuminuria based on converted and unconverted ACR (albumin-creatinine-ratio) defined as A1 (<3 mg/mmol), A2 (3-29 mg/mmol), A3<60 (30-59 mg/mmol), and A3≥60 (≥60 mg/mmol). Converted values were obtained using validated conversion method. Conversion factor for ACR from mg/mmol to mg/g: 0.113.

<sup>b</sup>Categories of index eGFR in 5 ml/min/1.73 m<sup>2</sup> increments

<sup>c</sup>Number of eGFR measurements during the qualifying period before cohort entry

ACEi, angiotensin-converting enzyme inhibitor; ARB, angiotensin-receptor blocker; eGFR, estimated glomerular filtration rate (in mL/min/1.73 m<sup>2</sup>); KF: kidney failure; NSAIDs, non-steroidal anti-inflammatory drugs; TIA, transient ischemic attack.

**eTable 4.** Cause-Specific Hazard Ratios for Outcomes (Interaction Model)

| Covariates                        | Hazard ratio (95% confidence interval) |                    |                   |
|-----------------------------------|----------------------------------------|--------------------|-------------------|
|                                   | Regression                             | Progr. or KF       | Death             |
| Albuminuria <sup>a</sup>          |                                        |                    |                   |
| A1                                | 1 (reference)                          | 1 (reference)      | 1 (reference)     |
| A2                                | 0.47 (0.32, 0.70)                      | 2.01 (1.43, 2.81)  | 0.92 (0.77, 1.11) |
| A3 <sub>&lt;60</sub>              | 0.36 (0.13, 1.01)                      | 3.33 (2.11, 5.23)  | 0.90 (0.55, 1.46) |
| A3 <sub>≥60</sub>                 | 0.17 (0.09, 0.35)                      | 7.34 (5.33, 10.11) | 1.00 (0.77, 1.30) |
| Index eGFR <sup>b</sup>           |                                        |                    |                   |
| 15-19                             | 1 (reference)                          | 1 (reference)      | 1 (reference)     |
| 20-24                             | 1.31 (0.33, 5.24)                      | 0.58 (0.31, 1.10)  | 0.50 (0.19, 1.29) |
| 25-29                             | 2.03 (0.54, 7.71)                      | 0.26 (0.14, 0.49)  | 0.32 (0.13, 0.80) |
| 30-34                             | 3.34 (0.90, 12.35)                     | 0.24 (0.14, 0.41)  | 0.31 (0.13, 0.73) |
| 35-39                             | 2.93 (0.81, 10.58)                     | 0.15 (0.09, 0.25)  | 0.16 (0.07, 0.38) |
| 40-44                             | 1.65 (0.46, 5.97)                      | 0.08 (0.05, 0.14)  | 0.07 (0.03, 0.15) |
| Albuminuria by eGFR               |                                        |                    |                   |
| A2, 20-24                         | 1.17 (0.76, 1.79)                      | 0.98 (0.65, 1.49)  | 1.28 (1.03, 1.60) |
| A3 <sub>&lt;60</sub> , 20-24      | 0.84 (0.27, 2.57)                      | 0.74 (0.42, 1.29)  | 1.07 (0.61, 1.87) |
| A3 <sub>≥60</sub> , 20-24         | 1.05 (0.48, 2.32)                      | 0.86 (0.57, 1.27)  | 1.35 (0.98, 1.85) |
| A2, 25-29                         | 1.24 (0.83, 1.87)                      | 1.10 (0.74, 1.65)  | 1.27 (1.03, 1.56) |
| A3 <sub>&lt;60</sub> , 25-29      | 0.93 (0.31, 2.81)                      | 1.11 (0.64, 1.93)  | 1.30 (0.76, 2.23) |
| A3 <sub>≥60</sub> , 25-29         | 1.23 (0.57, 2.64)                      | 0.83 (0.56, 1.23)  | 1.57 (1.16, 2.12) |
| A2, 30-34                         | 1.49 (1.00, 2.23)                      | 0.88 (0.62, 1.26)  | 1.39 (1.14, 1.70) |
| A3 <sub>&lt;60</sub> , 30-34      | 1.11 (0.36, 3.38)                      | 0.87 (0.53, 1.42)  | 1.74 (1.01, 3.01) |
| A3 <sub>≥60</sub> , 30-34         | 1.20 (0.55, 2.59)                      | 0.74 (0.53, 1.03)  | 1.34 (0.99, 1.82) |
| A2, 35-39                         | 1.61 (1.09, 2.39)                      | 0.85 (0.60, 1.20)  | 1.42 (1.17, 1.73) |
| A3 <sub>&lt;60</sub> , 35-39      | 1.26 (0.43, 3.66)                      | 0.78 (0.48, 1.26)  | 1.76 (1.04, 2.98) |
| A3 <sub>≥60</sub> , 35-39         | 1.69 (0.81, 3.52)                      | 0.68 (0.49, 0.94)  | 1.48 (1.10, 1.99) |
| A2, 40-44                         | 1.86 (1.26, 2.75)                      | 0.98 (0.69, 1.39)  | 1.59 (1.31, 1.93) |
| A3 <sub>&lt;60</sub> , 40-44      | 1.83 (0.64, 5.25)                      | 1.06 (0.65, 1.71)  | 1.69 (1.00, 2.88) |
| A3 <sub>≥60</sub> , 40-44         | 2.05 (0.98, 4.29)                      | 0.85 (0.61, 1.18)  | 1.74 (1.29, 2.34) |
| Age (10 years)                    | 0.97 (0.83, 1.13)                      | 0.70 (0.66, 0.73)  | 1.67 (1.52, 1.83) |
| Age by eGFR                       |                                        |                    |                   |
| 20-24                             | 1.02 (0.87, 1.21)                      | 1.01 (0.94, 1.08)  | 1.06 (0.95, 1.18) |
| 25-29                             | 0.96 (0.81, 1.13)                      | 1.04 (0.97, 1.12)  | 1.09 (0.98, 1.21) |
| 30-34                             | 0.84 (0.72, 0.99)                      | 1.23 (1.16, 1.30)  | 1.08 (0.98, 1.20) |
| 35-39                             | 0.87 (0.75, 1.02)                      | 1.26 (1.19, 1.34)  | 1.15 (1.04, 1.26) |
| 40-44                             | 0.91 (0.78, 1.06)                      | 1.27 (1.20, 1.35)  | 1.25 (1.13, 1.38) |
| Male vs female                    | 0.85 (0.82, 0.89)                      | 1.09 (1.05, 1.13)  | 1.22 (1.18, 1.26) |
| Number of eGFR tests <sup>c</sup> | 1.05 (1.04, 1.06)                      | 1.03 (1.03, 1.04)  | 1.06 (1.05, 1.06) |
| Diabetes                          | 1.02 (0.98, 1.07)                      | 1.48 (1.42, 1.54)  | 1.15 (1.11, 1.19) |
| Myocardial infarction             | 0.99 (0.93, 1.06)                      | 0.93 (0.88, 1.00)  | 1.19 (1.13, 1.25) |
| Congestive heart failure          | 1.31 (1.25, 1.37)                      | 1.25 (1.20, 1.31)  | 1.95 (1.89, 2.02) |
| Stroke/TIA                        | 1.12 (1.07, 1.17)                      | 1.01 (0.96, 1.06)  | 1.24 (1.20, 1.28) |
| Peripheral vascular disease       | 1.11 (1.03, 1.20)                      | 1.09 (1.01, 1.18)  | 1.50 (1.42, 1.58) |
| ACEi/ARB                          | 1.04 (0.99, 1.09)                      | 1.12 (1.07, 1.18)  | 0.77 (0.74, 0.79) |
| NSAIDs                            | 1.30 (1.25, 1.36)                      | 0.93 (0.88, 0.97)  | 0.89 (0.86, 0.93) |
| Statin                            | 0.97 (0.93, 1.01)                      | 1.01 (0.97, 1.05)  | 0.79 (0.76, 0.82) |

Model log-likelihood (LL) -116410.3 (Likelihood ratio test (chisq.) vs model without albuminuria by eGFR interaction (eTable 2) 66.8 [DF 15], p<0.01)

Progr. or KF: Progression or kidney failure

<sup>a</sup>Categories of albuminuria based on converted and unconverted ACR (albumin-creatinine-ratio) defined as A1 (<3 mg/mmol), A2 (3-29 mg/mmol), A3<60 (30-59 mg/mmol), and A3≥60 (≥60 mg/mmol). Converted values were obtained using validated conversion method. Conversion factor for ACR from mg/mmol to mg/g: 0.113.

<sup>b</sup>Categories of index eGFR in 5 ml/min/1.73 m<sup>2</sup> increments

<sup>c</sup>Number of eGFR measurements during the qualifying period before cohort entry)

ACEi, angiotensin-converting enzyme inhibitor; ARB, angiotensin-receptor blocker; eGFR, estimated glomerular filtration rate (in mL/min/1.73 m<sup>2</sup>); KF: kidney failure; NSAIDs, non-steroidal anti-inflammatory drugs; TIA, transient ischemic attack.

**eTable 5.** Cause-Specific Hazard Ratios for Regression (Sensitivity and Subgroup Analyses) Associated With Albuminuria

| Model#                                        | Albuminuria category | Hazard ratio  | 2.5% confidence limit | 97.5% confidence limit |
|-----------------------------------------------|----------------------|---------------|-----------------------|------------------------|
| Main analysis (N=58,004)                      | A1                   | 1 (reference) | -                     | -                      |
|                                               | A2                   | 0.75          | 0.72                  | 0.79                   |
|                                               | A3a                  | 0.47          | 0.4                   | 0.54                   |
|                                               | A3b                  | 0.27          | 0.24                  | 0.3                    |
| Sensitivity analysis (N=58,004)               | A1                   | 1 (reference) | -                     | -                      |
|                                               | A2                   | 0.7           | 0.66                  | 0.74                   |
|                                               | A3a                  | 0.41          | 0.34                  | 0.49                   |
|                                               | A3b                  | 0.22          | 0.19                  | 0.25                   |
| Albuminuria type ACR (N=27,052)               | A1                   | 1 (reference) | -                     | -                      |
|                                               | A2                   | 0.71          | 0.67                  | 0.76                   |
|                                               | A3a                  | 0.45          | 0.38                  | 0.54                   |
|                                               | A3b                  | 0.21          | 0.18                  | 0.25                   |
| Albuminuria type DIP/PCR (N=30,952)           | A1                   | 1 (reference) | -                     | -                      |
|                                               | A2                   | 0.8           | 0.75                  | 0.86                   |
|                                               | A3a                  | 0.47          | 0.34                  | 0.64                   |
|                                               | A3b                  | 0.38          | 0.32                  | 0.46                   |
| Albuminuria 0-1 year before entry (N=42,444)  | A1                   | 1 (reference) | -                     | -                      |
|                                               | A2                   | 0.73          | 0.7                   | 0.78                   |
|                                               | A3a                  | 0.46          | 0.39                  | 0.55                   |
|                                               | A3b                  | 0.27          | 0.24                  | 0.31                   |
| Albuminuria 1-3 years before entry (N=15,560) | A1                   | 1 (reference) | -                     | -                      |
|                                               | A2                   | 0.79          | 0.72                  | 0.86                   |
|                                               | A3a                  | 0.5           | 0.35                  | 0.7                    |
|                                               | A3b                  | 0.25          | 0.18                  | 0.35                   |
| Prior outpatient eGFR(N=56,131)               | A1                   | 1 (reference) | -                     | -                      |
|                                               | A2                   | 0.76          | 0.73                  | 0.8                    |
|                                               | A3a                  | 0.47          | 0.4                   | 0.55                   |
|                                               | A3b                  | 0.27          | 0.24                  | 0.3                    |
| No prior outpatient eGFR(N=2,641)             | A1                   | 1 (reference) | -                     | -                      |
|                                               | A2                   | 0.49          | 0.35                  | 0.7                    |
|                                               | A3a                  | 0.47          | 0.19                  | 1.19                   |
|                                               | A3b                  | 0.26          | 0.12                  | 0.58                   |
| Sustained albuminuria (N=14,346)              | A1                   | 1 (reference) | -                     | -                      |
|                                               | A2                   | 0.69          | 0.65                  | 0.73                   |
|                                               | A3a                  | 0.42          | 0.35                  | 0.5                    |
|                                               | A3b                  | 0.24          | 0.21                  | 0.27                   |
| Non-sustained albuminuria (N=43,658)          | A1                   | 1 (reference) | -                     | -                      |
|                                               | A2                   | 0.8           | 0.76                  | 0.85                   |
|                                               | A3a                  | 0.64          | 0.47                  | 0.87                   |
|                                               | A3b                  | 0.39          | 0.3                   | 0.5                    |

#Models are non-interaction models including the same covariates as in eTable 3.

**eTable 6.** Cause-Specific Hazard Ratios, Subdistribution Hazard Ratios for Regression Associated With Albuminuria

| Model                                                     | eGFR <sup>a</sup> | Albuminuria category | Hazard ratio <sup>b</sup> | 2.5% confidence limit | 97.5% confidence limit |
|-----------------------------------------------------------|-------------------|----------------------|---------------------------|-----------------------|------------------------|
| Non-interaction Cause-specific Cox regression             | 15-44             | A1                   | 1 (reference)             |                       |                        |
|                                                           |                   | A2                   | 0.75                      | 0.72                  | 0.79                   |
|                                                           |                   | A3a                  | 0.47                      | 0.4                   | 0.54                   |
|                                                           |                   | A3b                  | 0.27                      | 0.24                  | 0.3                    |
| Non-interaction Sub-distribution Fine and Gray regression | 15-44             | A1                   | 1 (reference)             |                       |                        |
|                                                           |                   | A2                   | 0.67                      | 0.64                  | 0.7                    |
|                                                           |                   | A3a                  | 0.39                      | 0.33                  | 0.45                   |
|                                                           |                   | A3b                  | 0.16                      | 0.15                  | 0.19                   |
| Interaction Cause-specific Cox regression                 | 40-44             | A1                   | 1 (reference)             |                       |                        |
|                                                           |                   | A2                   | 0.88                      | 0.82                  | 0.95                   |
|                                                           |                   | A3a                  | 0.66                      | 0.51                  | 0.86                   |
|                                                           |                   | A3b                  | 0.36                      | 0.28                  | 0.45                   |
|                                                           | 35-39             | A1                   | 1 (reference)             |                       |                        |
|                                                           |                   | A2                   | 0.77                      | 0.71                  | 0.83                   |
|                                                           |                   | A3a                  | 0.46                      | 0.34                  | 0.62                   |
|                                                           |                   | A3b                  | 0.29                      | 0.24                  | 0.37                   |
|                                                           | 30-34             | A1                   | 1 (reference)             |                       |                        |
|                                                           |                   | A2                   | 0.71                      | 0.63                  | 0.8                    |
|                                                           |                   | A3a                  | 0.4                       | 0.26                  | 0.63                   |
|                                                           |                   | A3b                  | 0.21                      | 0.15                  | 0.29                   |
|                                                           | 25-29             | A1                   | 1 (reference)             |                       |                        |
|                                                           |                   | A2                   | 0.59                      | 0.52                  | 0.67                   |
|                                                           |                   | A3a                  | 0.34                      | 0.22                  | 0.51                   |
|                                                           |                   | A3b                  | 0.21                      | 0.16                  | 0.29                   |
|                                                           | 20-24             | A1                   | 1 (reference)             |                       |                        |
|                                                           |                   | A2                   | 0.55                      | 0.46                  | 0.66                   |
|                                                           |                   | A3a                  | 0.3                       | 0.19                  | 0.48                   |
|                                                           |                   | A3b                  | 0.18                      | 0.13                  | 0.26                   |
| 15-19                                                     | A1                | 1 (reference)        |                           |                       |                        |
|                                                           | A2                | 0.47                 | 0.32                      | 0.7                   |                        |
|                                                           | A3a               | 0.36                 | 0.13                      | 1.01                  |                        |
|                                                           | A3b               | 0.17                 | 0.09                      | 0.35                  |                        |
| Interaction Sub-distribution Fine and Gray regression     | 40-44             | A1                   | 1 (reference)             |                       |                        |
|                                                           |                   | A2                   | 0.78                      | 0.72                  | 0.84                   |
|                                                           |                   | A3a                  | 0.55                      | 0.43                  | 0.71                   |
|                                                           |                   | A3b                  | 0.24                      | 0.19                  | 0.3                    |
|                                                           | 35-39             | A1                   | 1 (reference)             |                       |                        |



|     |       |      |               |      |      |
|-----|-------|------|---------------|------|------|
|     |       | A2   | 0.68          | 0.63 | 0.73 |
|     |       | A3a  | 0.35          | 0.26 | 0.47 |
|     |       | A3b  | 0.18          | 0.14 | 0.23 |
|     | 30-34 | A1   | 1 (reference) |      |      |
|     |       | A2   | 0.61          | 0.54 | 0.68 |
|     |       | A3a  | 0.29          | 0.19 | 0.45 |
|     |       | A3b  | 0.11          | 0.08 | 0.15 |
|     | 25-29 | A1   | 1 (reference) |      |      |
|     |       | A2   | 0.55          | 0.48 | 0.62 |
|     |       | A3a  | 0.31          | 0.2  | 0.47 |
|     |       | A3b  | 0.15          | 0.11 | 0.21 |
|     | 20-24 | A1   | 1 (reference) |      |      |
|     |       | A2   | 0.5           | 0.42 | 0.59 |
|     |       | A3a  | 0.3           | 0.19 | 0.48 |
|     |       | A3b  | 0.11          | 0.08 | 0.16 |
|     | 15-19 | A1   | 1 (reference) |      |      |
| A2  |       | 0.43 | 0.3           | 0.63 |      |
| A3a |       | 0.29 | 0.1           | 0.83 |      |
| A3b |       | 0.08 | 0.04          | 0.18 |      |

Legend: Non-interaction models do not include the interaction between albuminuria and eGFR; interaction models do. Models are adjusted for the same variables included in the Cox models summarized in eTables 2-3.

eGFR<sup>a</sup> indicates the index eGFR category in 5 ml/min/1.73 m<sup>2</sup> increments from 15 to 44.

Hazard ratio<sup>b</sup> indicates the exponentiated coefficient of the model, cause-specific hazard ratio for Cox regression and sub-distribution hazard ratio for the Fine and Gray model.

**eFigure 1.** Derivation of Study Cohort

|                                                                                                                           |                     |                    |
|---------------------------------------------------------------------------------------------------------------------------|---------------------|--------------------|
| <b>Number of residents registered in Alberta Health Apr 1, 1994 – Mar 31, 2017 (N)</b>                                    | <b>4,983,956</b>    |                    |
| <b>Common exclusion criteria (N excluded):</b>                                                                            | <b>4,644,966</b>    |                    |
| • No serum creatinine measurements, May 1, 2002 – Mar 31, 2017                                                            | 1,573,084           |                    |
| • No outpatient serum creatinine measurements                                                                             | 201,969             |                    |
| • All outpatient serum creatinine were tested under 18 years old                                                          | 31,971              |                    |
| • All outpatient serum creatinine measurements were after out-migration, registration end or accrual end (March 31, 2017) | 6,099               |                    |
| • Never had an outpatient eGFR measurement <60 ml/min/1.73 m <sup>2</sup>                                                 | 2,697,464           |                    |
| • Only 1 outpatient eGFR <60 ml/min/1.73 m <sup>2</sup>                                                                   | 129,412             |                    |
| • The first eGFR less than 60 was already <15 ml/min/1.73 m <sup>2</sup>                                                  | 4,967               |                    |
| <b>Incident CKD stage (N)</b>                                                                                             | <b>G3b (54,725)</b> | <b>G4 (18,674)</b> |
| <b>Unique exclusion criteria (N excluded):</b>                                                                            | <b>284,265</b>      | <b>320,316</b>     |
| • Did not meet the sustained eGFR criterion for specific stage, for >90 days                                              | 246,755             | 307,004            |
| • Index date was not between Apr 1, 2008 and Mar 31, 2017                                                                 | 36,510              | 12,197             |
| • Index date was on the earliest date of death, out-migration, registration end or accrual end                            | 20                  | 8                  |
| • At least 1 outpatient eGFR <15 ml/min/1.73 m <sup>2</sup> prior to the qualifying period                                | 282                 | 541                |
| • Initiated kidney replacement therapy on or prior to index date                                                          | 698                 | 566                |
| <b>G3b-G4 CKD Cohort</b>                                                                                                  | <b>65,509</b>       |                    |
| No proteinuria measurements in the 3 years look-back window                                                               | 7,505               |                    |
| <b>G3b-G4 CKD with at least 1 proteinuria measurements within 3 years of meeting G3b G4 CKD criteria (Cohort size N)</b>  | <b>58,004</b>       |                    |

**Legend**

- Alberta population registry started in 1994. Serum creatinine database started on May 1, 2002, with nearly complete coverage from July 1, 2003 (~98% of the Alberta population) and complete coverage from January 1, 2005 (100%). The ~1/3 of the population (n=1,573,084) who never had an eGFR measurement largely comprises people who were in the registry before the study start date (April 1, 2009). We considered all the available information preceding Apr 1, 2008 (look-back window for eGFR measurements and other data) to minimize the inclusion of prevalent cases in the incident CKD cohorts between Apr 1, 2008, and Mar 31, 2017.

Of those who were registered for at least 1 fiscal year between Apr 1, 2008, and Mar 31, 2017, 22% did not have a serum creatinine measurement. Most of these (~85%) were younger than 40 years, an expected figure considering that a screening test for serum creatinine is not recommended for most people under 40 in the absence of risk factors for CKD.

- Sustained eGFR criterion for specific stage: eGFR 30-44 ml/min/1.73 m<sup>2</sup> for G3b CKD and 15-29 ml/min/1.73 m<sup>2</sup> for G4 CKD.
- G3b-G4 CKD cohort: if an individual appeared in both G3b and G4 CKD cohorts, only the observation in G3b cohort was used (first encounter).

**eFigure 2.** Study Participants With Missing Albuminuria Measures Per Year Prior to the Study Period

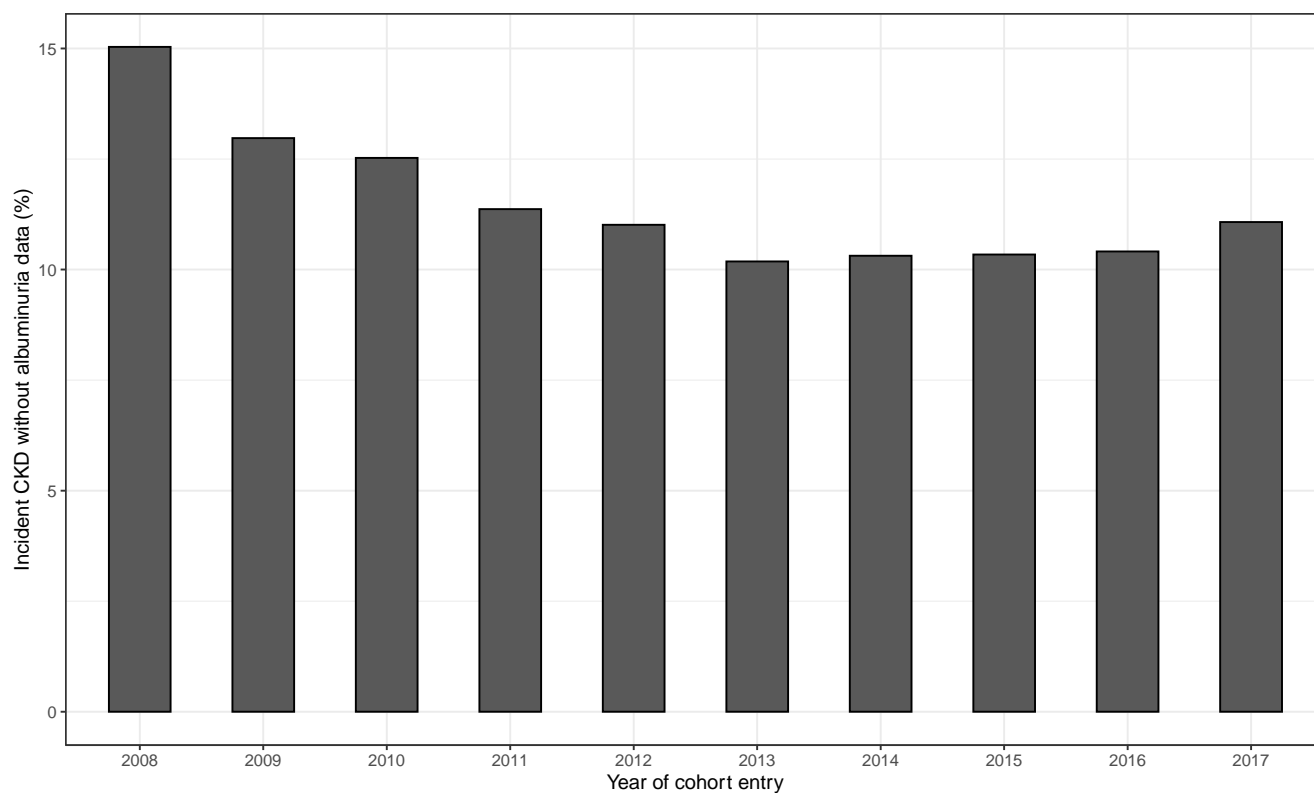

Bars refer to the percentage of incident adults with CKD who were not tested for albuminuria during the study accrual period.

**eFigure 3.** Cumulative Incidence Functions for Outcomes in People With Complete and Missing Albuminuria Data

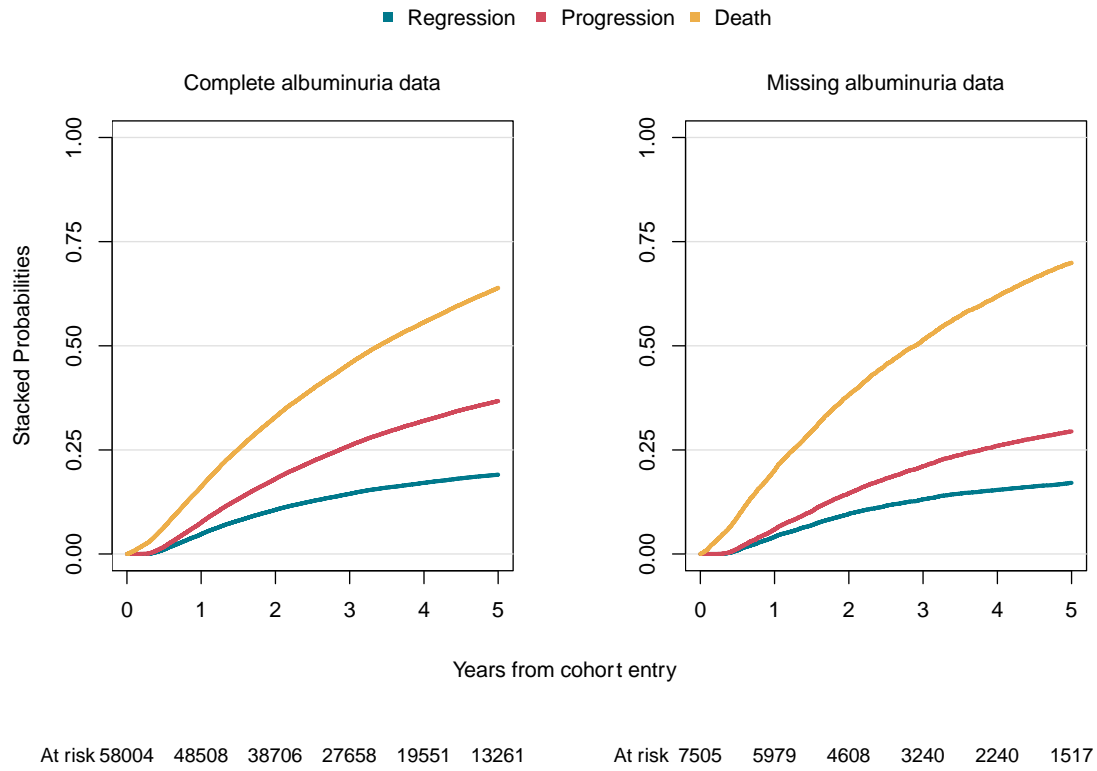

Legend: Cumulative incidence of CKD regression, CKD progression (progression or kidney failure), and death without regression, progression or kidney failure for participants with and without available measures of albuminuria.

**eFigure 4.** Association Between eGFR and CKD Regression Across Albuminuria Categories

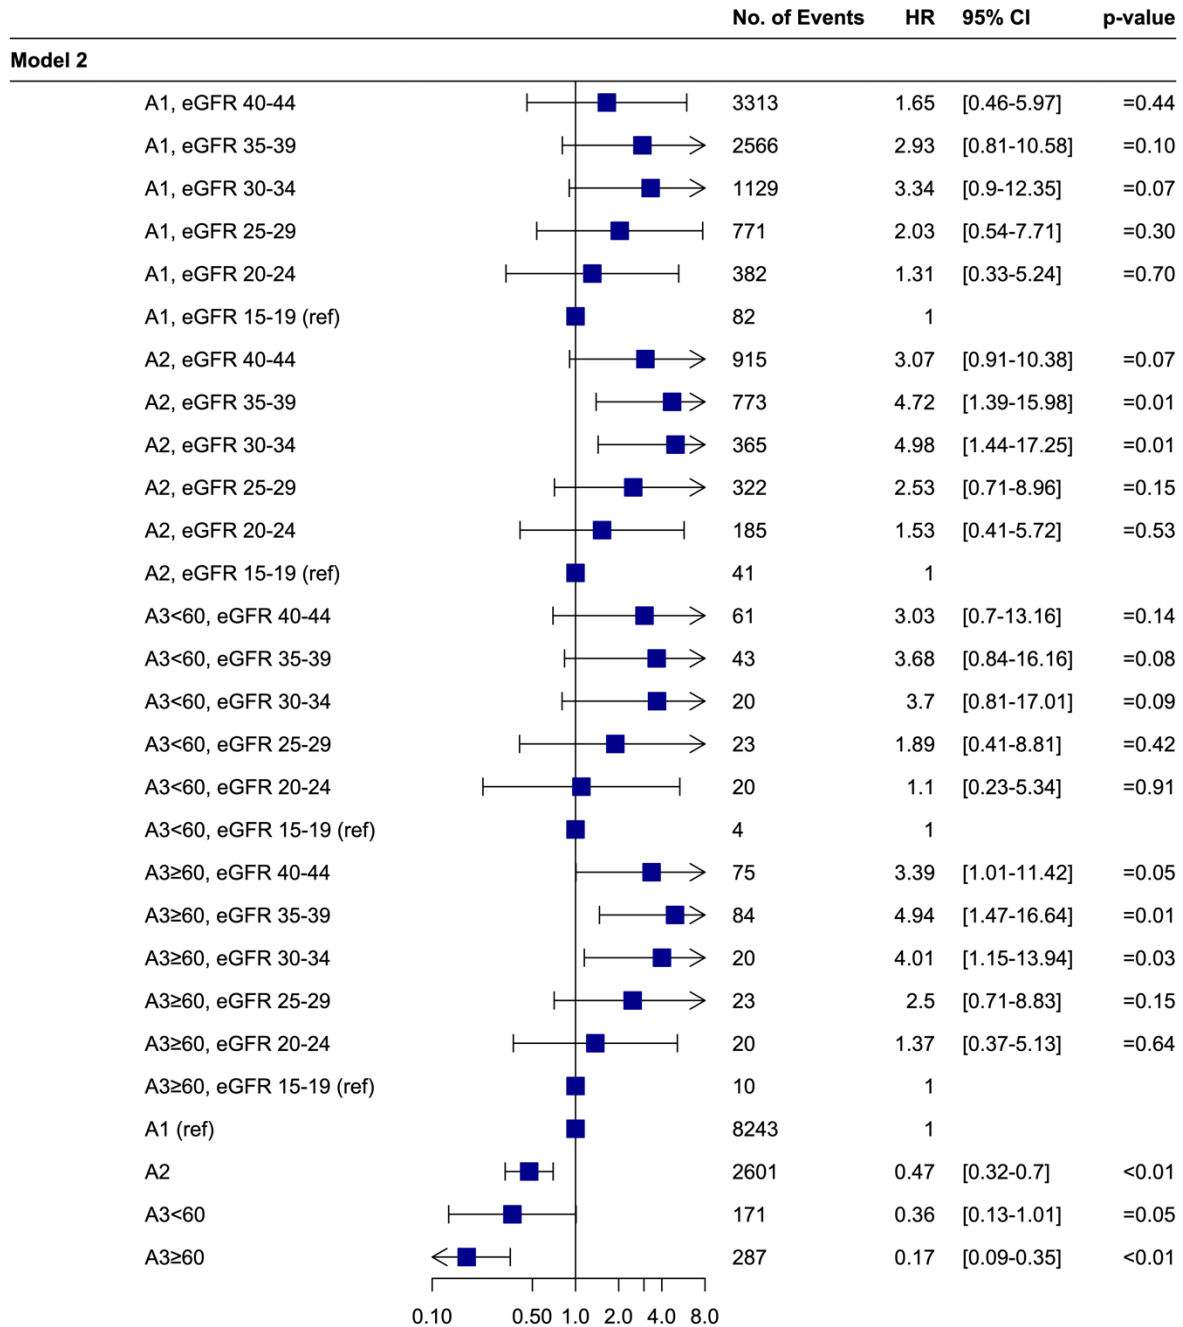

Model 2 is the same model as Model 2 in Figure 4. Model 2 includes the same covariates as Model 1 in Figure 4 (eTable 3), with the additional interaction between albuminuria and index eGFR category (eTable 4). This model shows the linear combinations of the coefficients (epidemiological formulation) instead of differences in log-hazard ratios (statistical interaction formulation) to summarize the association between eGFR and CKD regression across categories of albuminuria.

**eFigure 5.** Crude 5-Year Risk of Outcomes by Category of Albuminuria (Sensitivity Analysis)

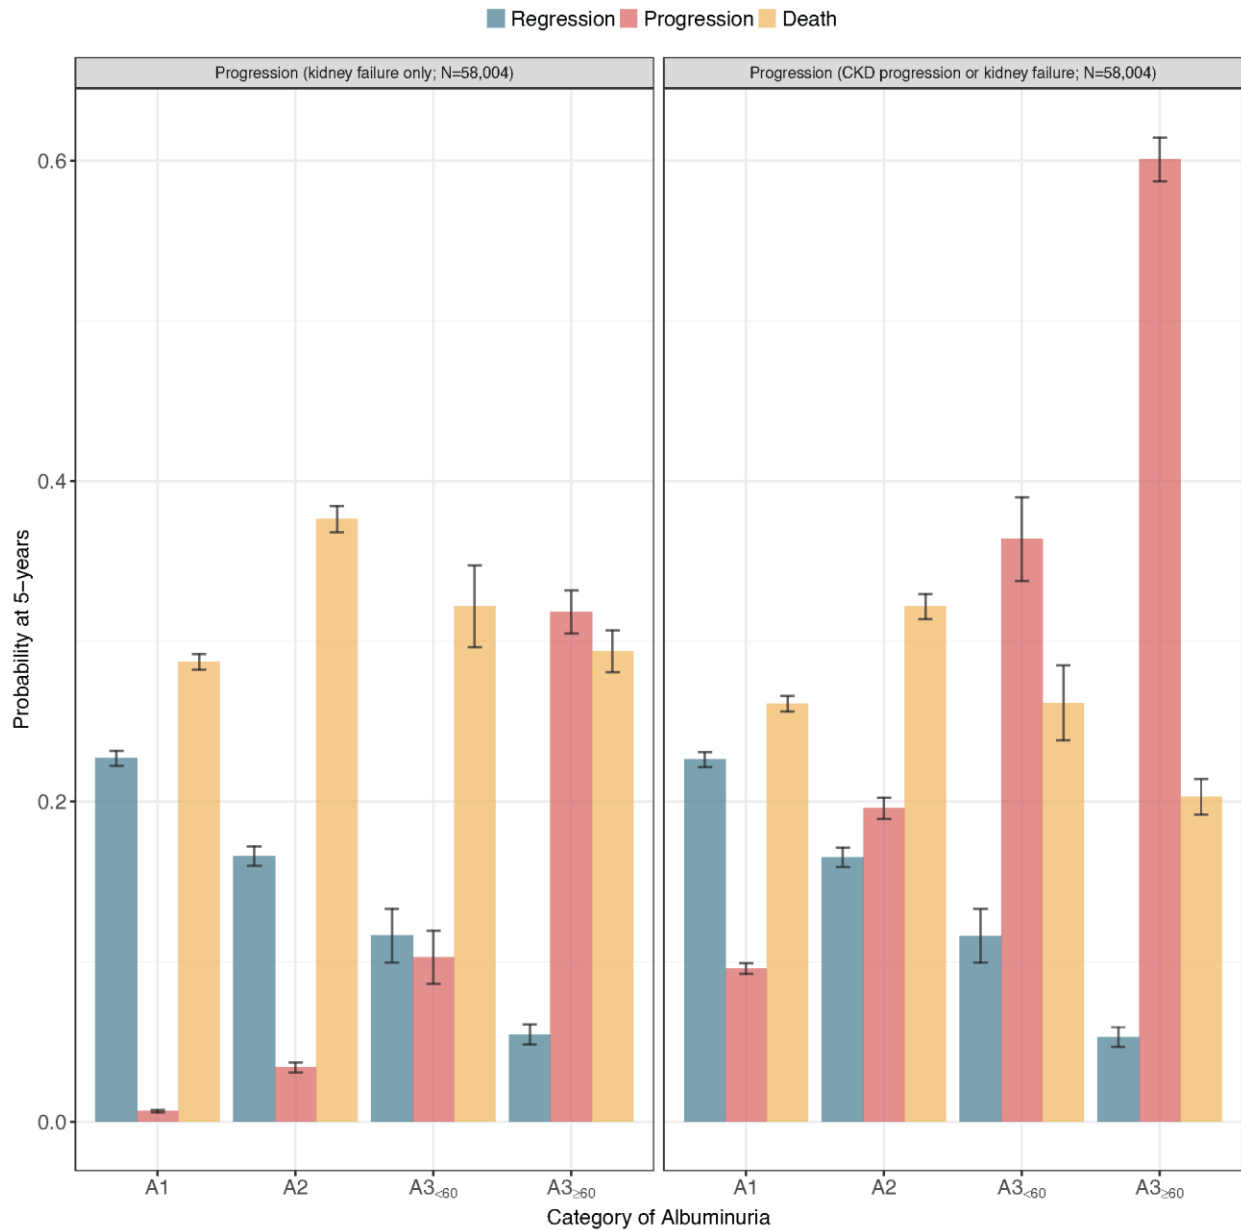

Outcome probabilities were estimated using cumulative incidence functions at 5 years after study entry by category of albuminuria. Progression represents chronic kidney disease (CKD) kidney failure only (i.e., sustained eGFR <10 ml/min/1.73 m<sup>2</sup> or initiation of chronic kidney replacement therapy). Death refers to death without regression or kidney failure.

**eFigure 6. Crude 5-Year Risk of Outcomes by Diabetes Status**

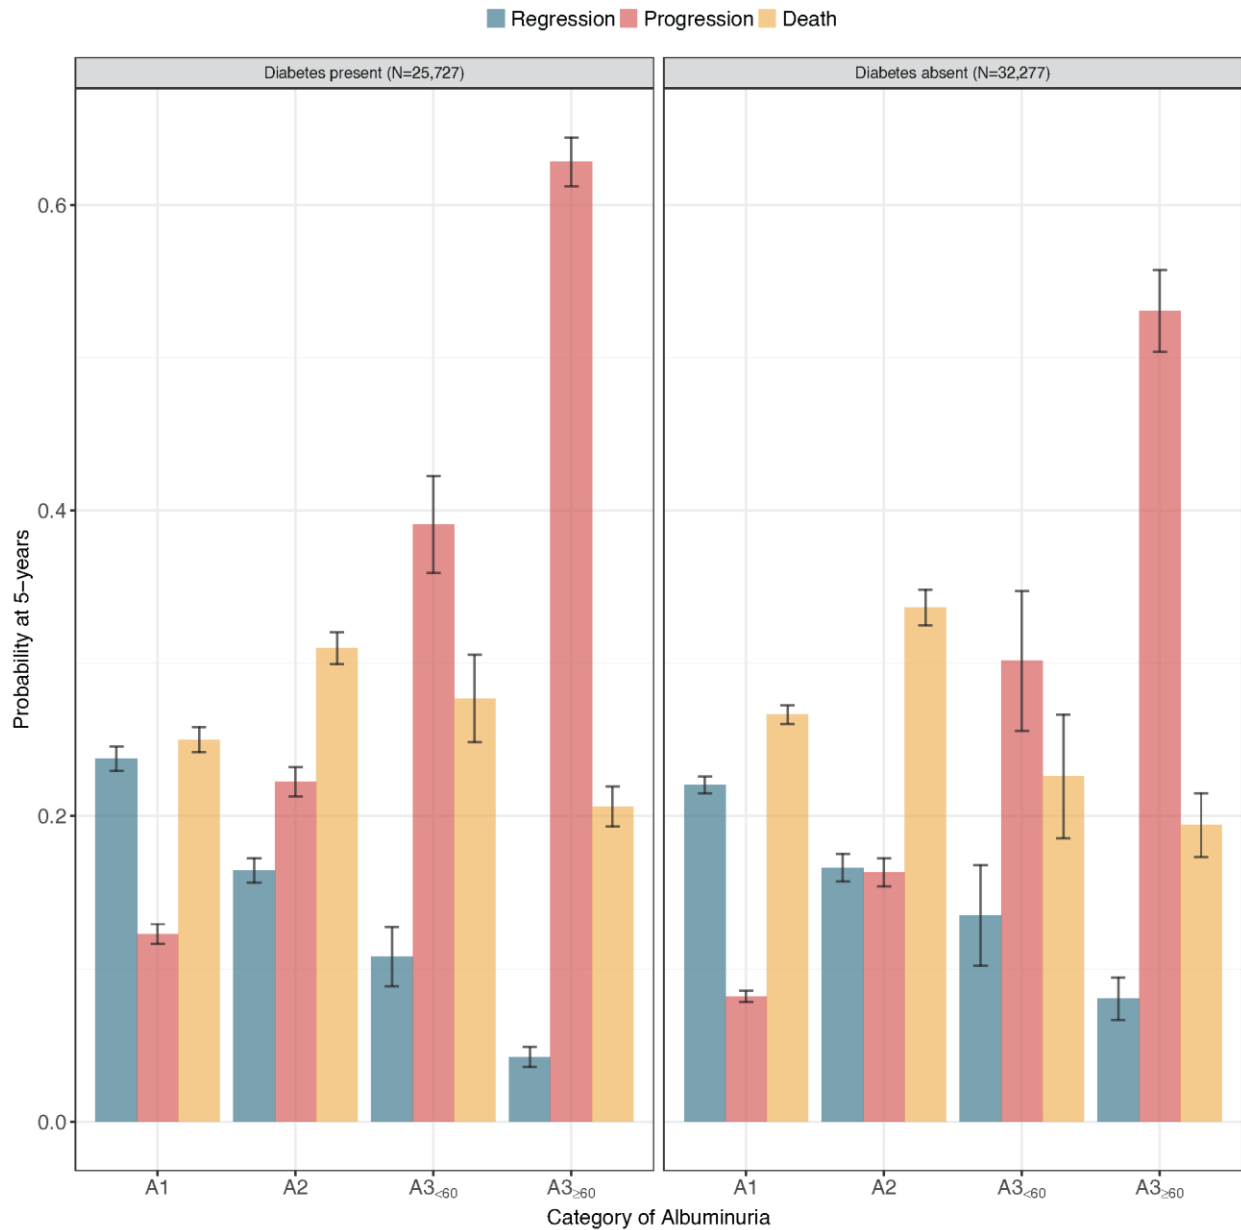

Outcome probabilities were estimated using cumulative incidence functions at 5 years after study entry by category of albuminuria. Progression represents chronic kidney disease (CKD) progression or kidney failure. Death refers to death without regression, progression or kidney failure.



**eFigure 7. Crude 5-Year Risk of Outcomes According to the Type of Albuminuria Measurement**

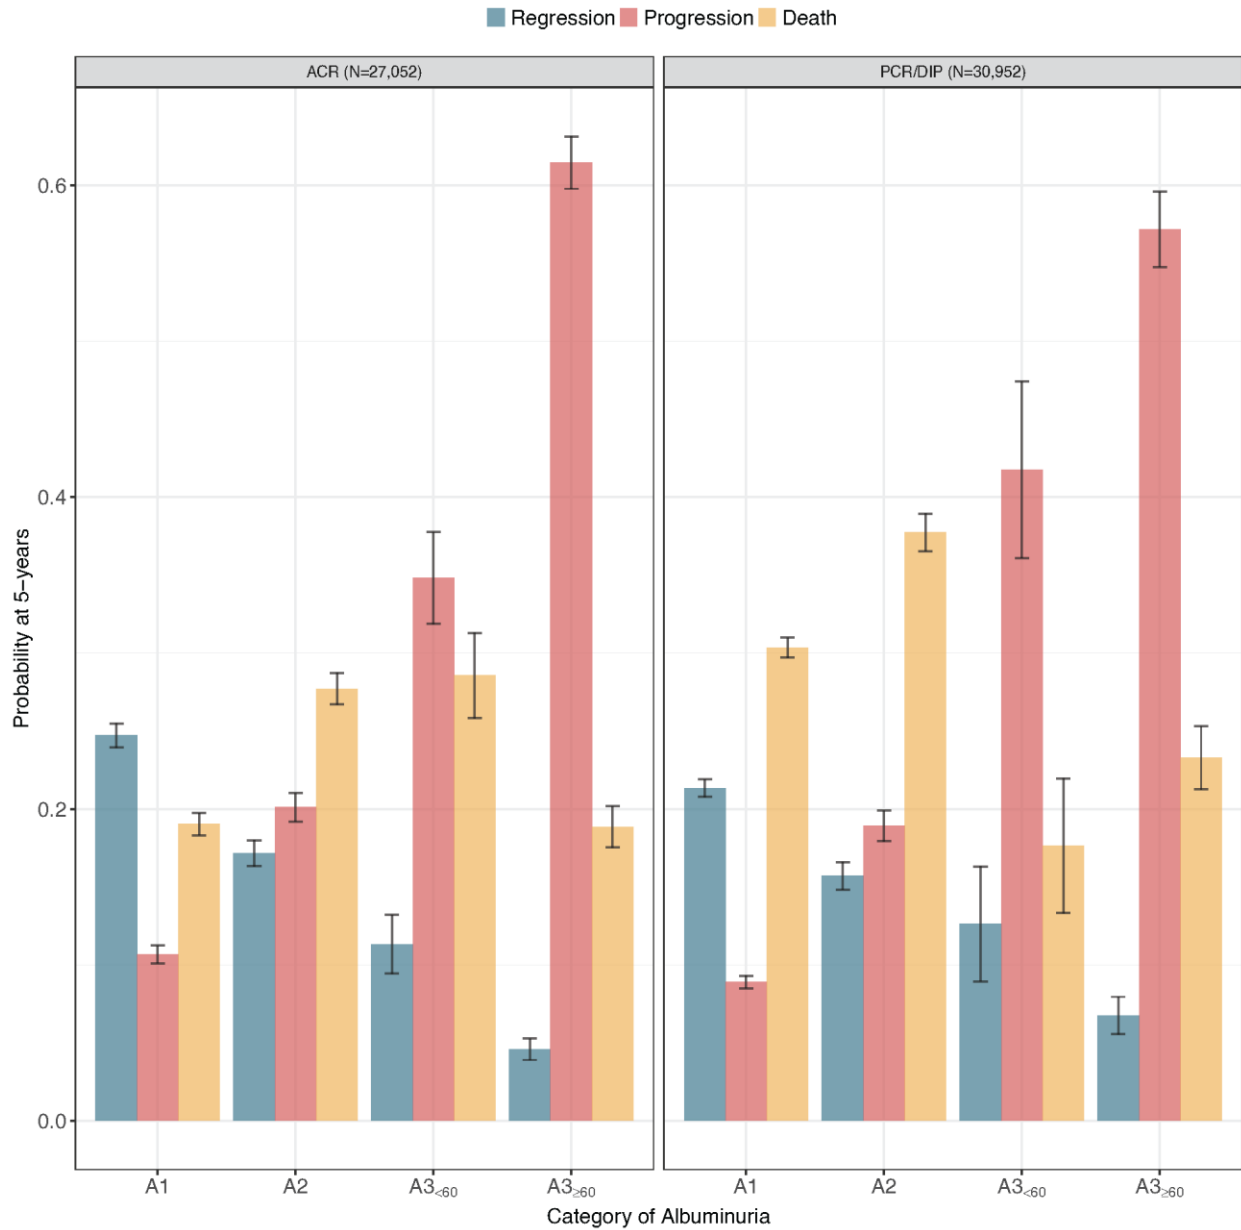

Outcome probabilities were estimated using cumulative incidence functions at 5 years after study entry by category of albuminuria. Progression represents chronic kidney disease (CKD) progression or kidney failure. Death refers to death without regression, progression or kidney failure. ACR: albumin to creatinine ratio; PCR: protein to creatinine ratio; DIP: dipstick urine protein.

**eFigure 8. Crude 5-Year Risk of Outcomes According to Timing of Albuminuria Measurement**

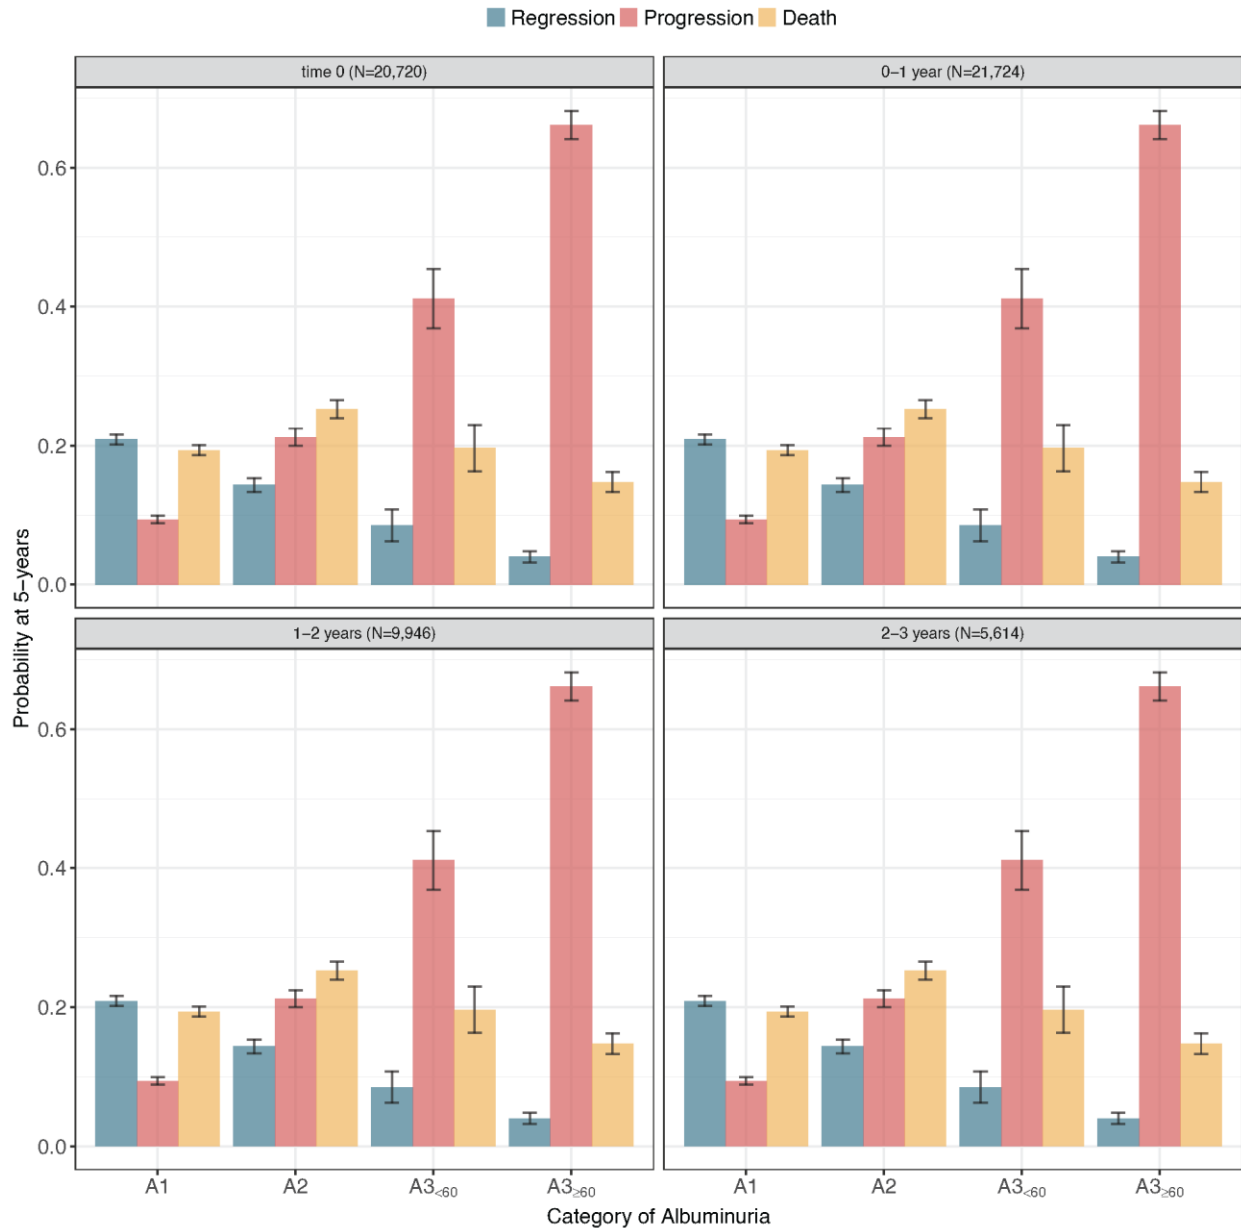

Outcome probabilities were estimated using cumulative incidence functions at 5 years after study entry by category of albuminuria. Progression represents chronic kidney disease (CKD) progression or kidney failure. Death refers to death without regression, progression or kidney failure. Time 0: albuminuria measured on the index date; time 0-1: albuminuria measured in the year before index date; time 1-2: albuminuria measured in the second year before index date; time 2-3: albuminuria measured in the third year before index date.

**eFigure 9.** Crude 5-Year Risk of Outcomes in Participants Without and With eGFR Before Study Entry

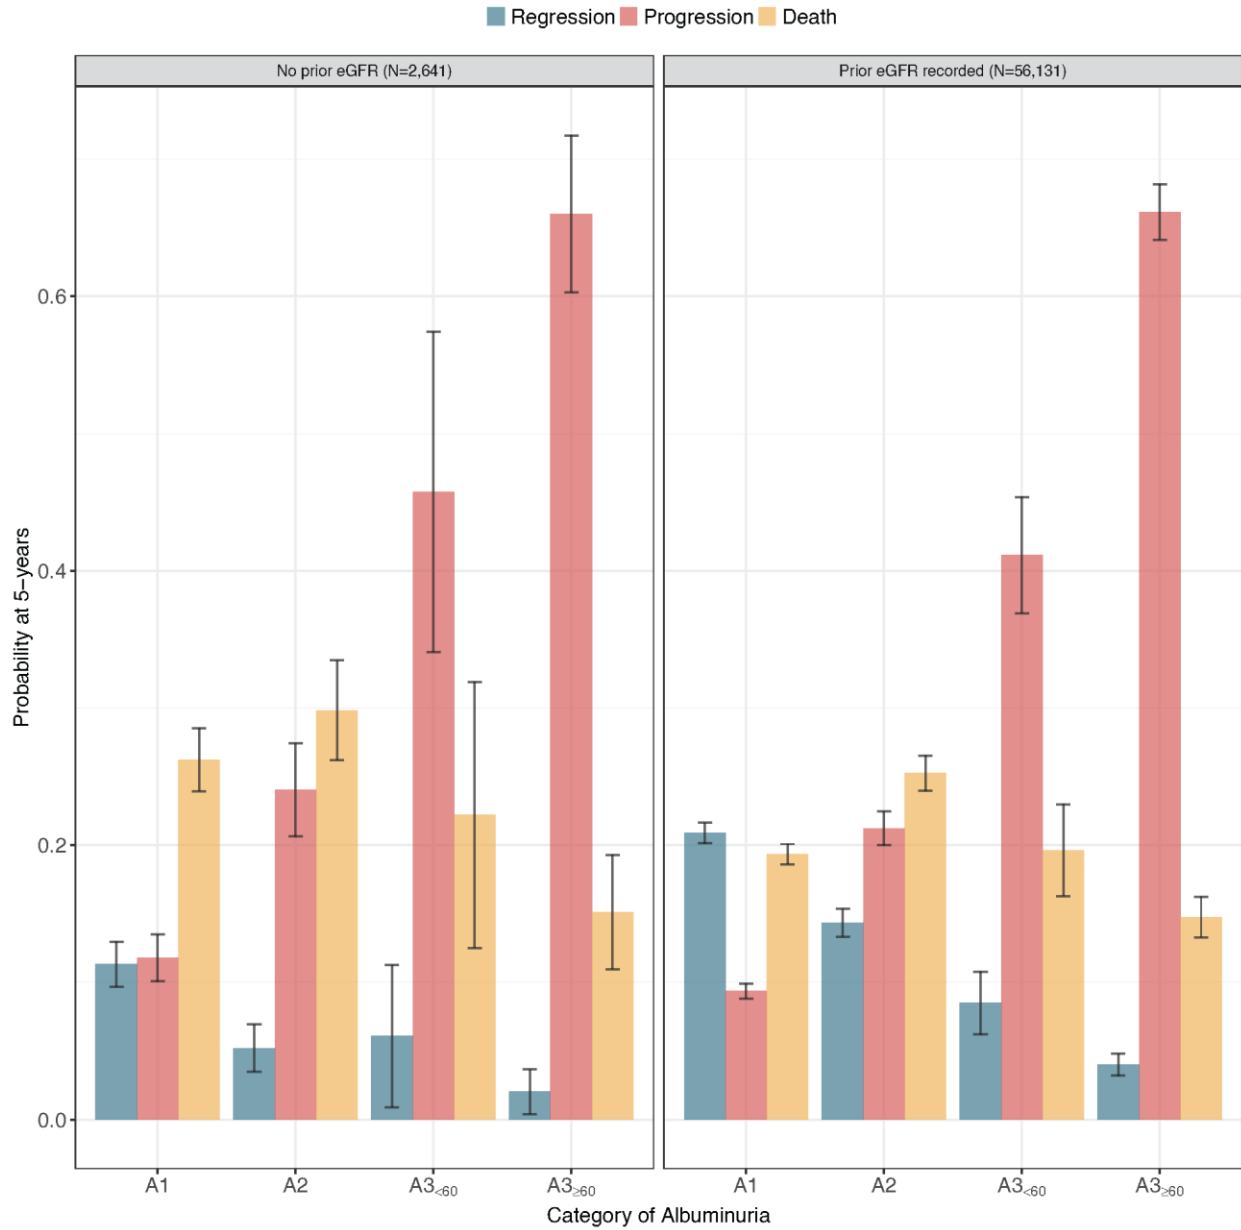

Outcome probabilities were estimated using cumulative incidence functions at 5 years after study entry by category of albuminuria. Progression represents chronic kidney disease (CKD) progression or kidney failure. Death refers to death without regression, progression or kidney failure.

**eFigure 10.** Crude 5-Year Risk of Outcomes in Participants With and Without Sustained Albuminuria at Baseline

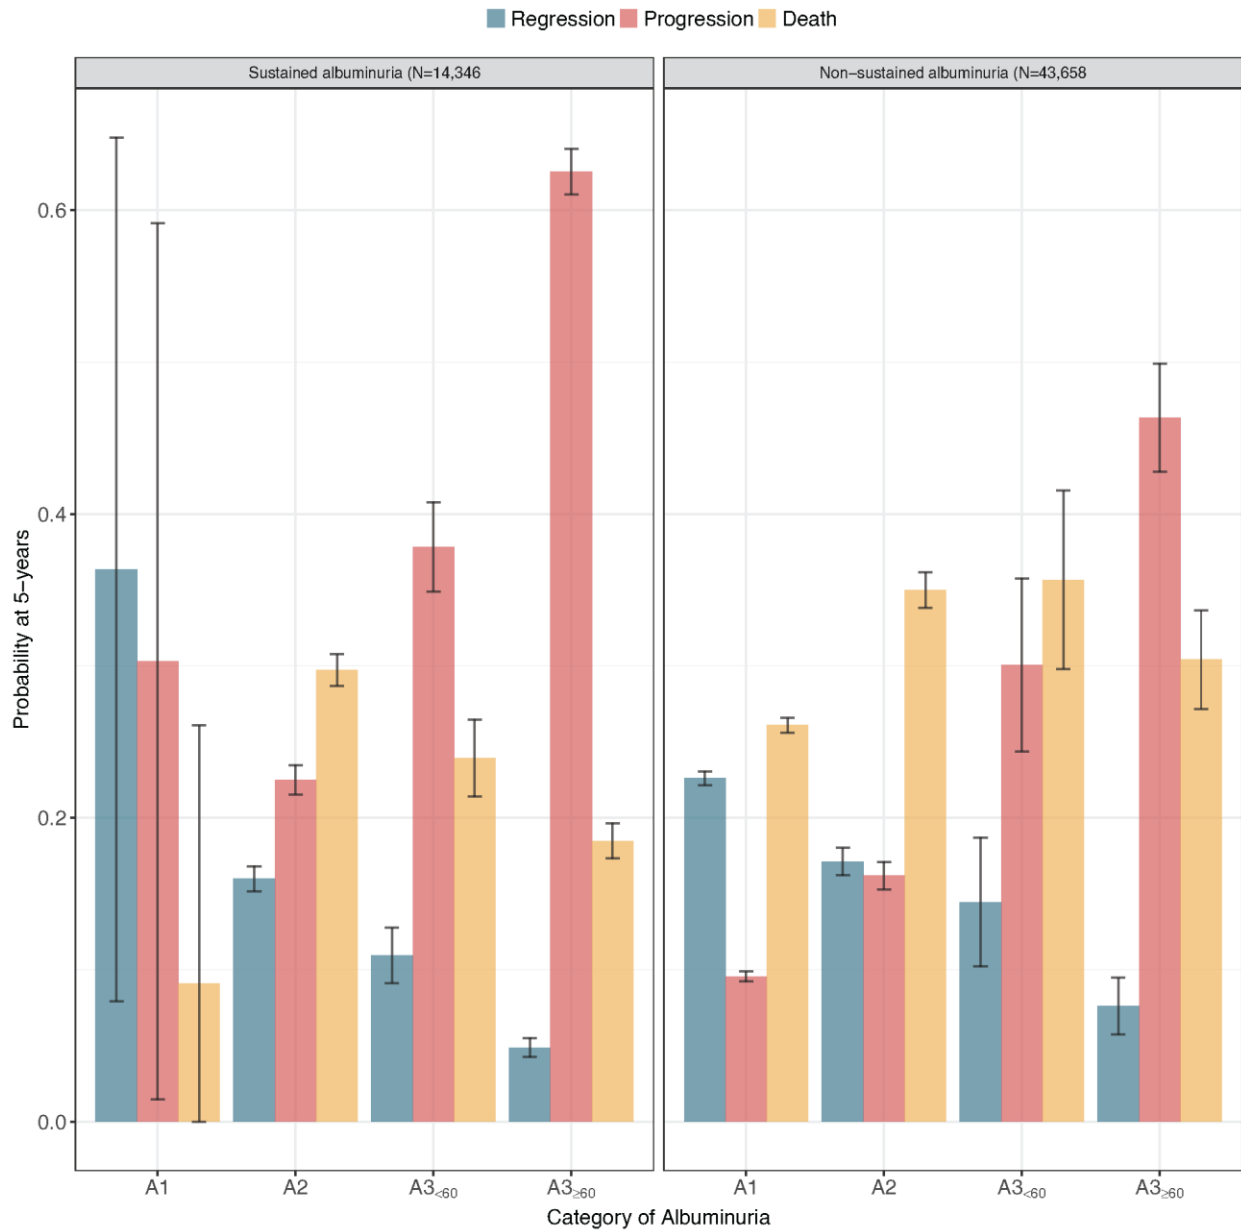

Outcome probabilities were estimated using cumulative incidence functions at 5 years after study entry by category of albuminuria. Progression represents chronic kidney disease (CKD) progression or kidney failure. Death refers to death without regression, progression or kidney failure.
